# Supplementary material
Source: publisher figshare collection journal article supplement (https://springernature.figshare.com/ndownloader/files/37492690)
Supplement: Supplementary file 1 [file 37492690]

## Sheet: Fig. 1b
Fig. 1b
Cell Titer Glo
Raw							Fold Change
	Control sgRNA-1	Control sgRNA-2	Tbk1 sgRNA-1	Tbk1 sgRNA-2				Control sgRNA-1	Control sgRNA-2	Tbk1 sgRNA-1	Tbk1 sgRNA-2
	312446	293340	294470	303145				1	0.93885	0.942467	0.970232
	302561	300199	300804	305909				0.968363	0.960803	0.962739	0.979078
	305850	291514	292759	317963				0.978889	0.933006	0.936991	1.01766
	272582	252020	288152	277869				0.872413	0.806603	0.922246	0.889334
	284472	269133	241183	266805				0.910468	0.861374	0.771919	0.853924
	273610	262402	251426	285247				0.875703	0.839832	0.804702	0.912948
	265002	251062	245872	275583				0.848153	0.803537	0.786926	0.882018
	274111	261702	244140	278873				0.877307	0.837591	0.781383	0.892548
	256323	251596	258213	266493				0.820375	0.805246	0.826424	0.852925

## Sheet: Fig. 1c
Fig. 1c
Tumour Volume
GVAX only
	Day	Control sgRNA (tumour volume - mm3)										Tbk1 sgRNA (tumour volume - mm3)
	0	0	0	0	0	0	0	0	0	0	0	0	0	0	0	0	0	0	0	0	0
	6	4	144	112.5	125	162	137.5	4	75	100	162	125	112.5	198	64	269.5	112.5	31.5	64	245	112.5
	9	384	864	567	448	800	850	162	384	1224	850	800	512	800	607.5	1089	1008	198	269.5	750	607.5
	12	1152	1666	1152	700	1521	1943.5	786.5	700	1960	2560	1296	1149.5	1521	1690	1440	2890	445.5	850	1774.5	850
	Days	Control sgRNA										Tbk1 sgRNA
		Mouse 1	Mouse 2	Mouse 3	Mouse 4	Mouse 5	Mouse 1	Mouse 2	Mouse 3	Mouse 4	Mouse 5	Mouse 1	Mouse 2	Mouse 3	Mouse 4	Mouse 5	Mouse 1	Mouse 2	Mouse 3	Mouse 4	Mouse 5
	0	0	0	0	0	0	0	0	0	0	0	0	0	0	0	0	0	0	0	0	0
	6	13.5	80	36	36	40.5	49.5	80	96	88	80	88	88	54	72	56	31.5	27	64	45	20
	9	80	367.5	137.5	343	162.5	367.5	318.5	480	212.5	544	392	270	54	63	352	72	125	36	54	49.5
	12	58.5	512	252	1224	688.5	900	343	480	137.5	480	1089	850	54	7	36	27	180	3.5	6	80
	15	355.25	196.625	968	587.25		729	279	480	88	330.75	1210	900	24	0	14	6	125	0	0	80
	18	576	252	1028.5	877.25		1000	269.5	512	80	330.75		1000	16	0	2.5	1	180	0	0	48
	21	1270.5	343	2156	1440			607.5	1149.5	125	1210			112	0	31.5	62.5	352	0	0	56
Survival
GVAX only
		Days elapsed	Control sgRNA	Tbk1 sgRNA				Days elapsed	Control sgRNA	Tbk1 sgRNA
		12	1					12	1
		15	1					21	1
		12	1					30	1
		15	1					21	1
		12	1					21	1
		15		1				18	1
		12		1				27	1
		12		1				24	1
		15		1				30	1
		12		1				24	1
								15		1
								18		1
								32		1
								53		0
								53		0
								49		1
								24		1
								53		0
								53		0
								37		1

## Sheet: Fig. 1d
Fig. 1d
Tumour Volume
B16-ova
		Days	Control										αPD-1										TBK1i										αPD-1+TBK1i
			Mouse 1	Mouse 2	Mouse 3	Mouse 4	Mouse 5	Mouse 6	Mouse 7	Mouse 8	Mouse 9	Mouse 10	Mouse 1	Mouse 2	Mouse 3	Mouse 4	Mouse 5	Mouse 6	Mouse 7	Mouse 8	Mouse 9	Mouse 10	Mouse 1	Mouse 2	Mouse 3	Mouse 4	Mouse 5	Mouse 6	Mouse 7	Mouse 8	Mouse 9	Mouse 10	Mouse 1	Mouse 2	Mouse 3	Mouse 4	Mouse 5	Mouse 6	Mouse 7	Mouse 8	Mouse 9	Mouse 10
		1	103.62	85.53	119.33	89.87	133.82	131.3	120.08	82.97	112.68	130.27	97.1	145.63	83.28	97.25	150.03	71.76	108.37	139.7	112.45	97.58	96.53	147.51	86.61	115.38	139.2	123.01	139.81	74.44	83.72	93.89	156.42	81.93	95.94	72.63	87.69	118.43	120.22	108.32	98.4	149.23
		2	131.52	109.68	168.16	119.35	166.55	184.4	170.93	127.74	156.45	159.65	151.44	196.61	111.24	128.53	189.22	123.53	135.33	181.17	136.42	144.53	123.87	184.1	119.12	164.82	178.34	163.64	174.39	115.05	127.5	137.23	226.22	105.43	127.16	96.18	125.5	157.97	164.6	146.56	149.03	205.13
		5	181.39	182.42	294.03	191.23	263.06	330.48	321.76	189.54	295.08	233.83	302.3	316.02	145.14	155.61	233.81	174.2	193.36	309.35	177.46	228.17	173.44	243.49	214.95	250.51	252.9	219.72	222.81	152.56	200.74	205.99	362.45	137.54	188.87	185.69	178.37	180.61	233.59	214.32	253.22	298.66
		7	206.61	213.65	391.19	224.1	309	473.25	360.82	216.78	399.75	254.24	371.13	417.52	101.87	129.67	244.41	157.5	175.31	445.98	154.55	293.12	185.6	274.44	286.15	336.32	284.79	240.6	208.06	141.45	167.65	189.49	386.44	111.8	174.21	166.5	166.29	120.5	192.65	179.89	355.8	257.74
		9	275.65	342.82	656.32	370.37	530.2	702.04	624.49	304.7	732.12	357.04	505.34	518.89	93.51	130.9	310.09	184.05	121.32	708.22	156.17	424.15	197.19	351.53	510.84	517.33	379.3	358.72	201.6	147.68	192.39	198.11	422.27	88.16	181.53	157.36	167.33	102.85	180.34	157.73	544.25	237.17
		12	394.4	580.32	1050.54	594.14	718.01	1255	1139.46	617.11	1167.85			674.13	87.45	141.21	408.02	302.16	89.77	1209.97	170.01	654.35	233.02	447.27	873.7	687.05	731.77	755.8	393.23	218.67	335.27	361.36	487.34	83.18	167.23	137.85	188.7	80.33	170.9	137.44	783.85	217.25
		14	541.06	1090.93	1787.47	848.48	1285.01	1901.38	1717.27	771.9	1600.26			882.23	76.22	156.28		452.91	83.84	1741.48	185.01		265.74	734.95	1285.35			1292.79	640.83	259.53	682.03	683.73	718.29	78.37	184.12	129.91	304.21	73.47	148.72	108.8	824.06	178.64
		16	628.78	1544.04	2300.72	1199.05	1832.65	2555.81		953.65	2652.34			1098.2	75.09	171.63		706.36	83.69	2314.89	197.32		401.24	903.81	1902.47			2085.89	1079.77	363.86	1402.48	1243.09	902.13	70.28	207.06	117.22	568.86	66.83	126.39	98.02	880.35	170.47

## Sheet: Fig. 1e
Fig. 1e
B16-ova MDOTS
		B16-ova MDOTS
	Control	1.39576e+06	1.48317e+06	1.63915e+06
	PD-1	558798	641502	1.02298e+06
	TBK1i	574118	666407	539106
	PD-1+TBK1i	506030	242147	279974
	FC
	Control	1	1.06263	1.17438
	PD-1	0.400355	0.459609	0.73292
	TBK1i	0.411331	0.477453	0.386247
	PD-1+TBK1i	0.362549	0.173488	0.20059
	L2FC
	Control	0	0.0876395	0.231902
	PD-1	-1.32065	-1.12152	-0.448273
	TBK1i	-1.28163	-1.06657	-1.37241
	PD-1+TBK1i	-1.46375	-2.52709	-2.31768

## Sheet: Fig. 1f
Fig. 1f
D4M.3A (Braf-mutant/Pten-null) MDOTS
Viability
	Raw
	Control	1.05816e+06	911506	1.00326e+06	847582	823295	1430896	922855	969850	656829
	PD-1	1.15307e+06	883245	935996	1058858	490638	1035142	558038	860512	285742
	TBK1i	505373	134894	604553	442993	235026	466656	498474	892677	367854
	PD-1+TBK1i	355422	391076	90409.6	15544	88372.8	96179.6	363698	155174	54147.5
	FC
	Control	1	0.861406	0.948117	1	0.971346	1.68821	1	1.05092	0.711736
	PD-1	1.0897	0.834698	0.88455	1.24927	0.578868	1.22129	0.604687	0.932445	0.309628
	TBK1i	0.477596	0.127479	0.571325	0.522656	0.27729	0.550573	0.540143	0.9673	0.398605
	PD-1+TBK1i	0.335887	0.369581	0.0854404	0.0183392	0.104265	0.113475	0.394101	0.168146	0.0586739
	L2FC
	Control	0	-0.215235	-0.0768634	0	-0.0419428	0.755494	0	0.0716582	-0.490586
	PD-1	0.123926	-0.260673	-0.176984	0.321084	-0.788693	0.288404	-0.72574	-0.100909	-1.69139
	TBK1i	-1.06614	-2.97167	-0.807617	-0.936068	-1.85053	-0.860993	-0.888587	-0.0479654	-1.32697
	PD-1+TBK1i	-1.57395	-1.43604	-3.54894	-5.76893	-3.26168	-3.13955	-1.34336	-2.57222	-4.09114

## Sheet: Fig. 1g
Fig. 1f
B16-ova MDOTS (PD-1 resistant)
			B16-ova MDOTS (anti-PD-1 resistant)
			PBS
		Control	819647	481517	807867
		PD-1	550551	436620	822669
		TBK1i	450315	946500	951669
		PD-1+TBK1i	159178	641852	379941
		FC
			PBS
		Control	1	0.587468	0.985628
		PD-1	0.671692	0.532693	1.00369
		TBK1i	0.549402	1.15476	1.16107
		PD-1+TBK1i	0.194203	0.783084	0.463542
		L2FC	PBS
		Control	0	-0.767417	-0.0208845
		PD-1	-0.574128	-0.908625	0.00530875
		TBK1i	-0.864067	0.207599	0.215457
		PD-1+TBK1i	-2.36436	-0.352762	-1.10923

## Sheet: Fig. 2b
Fig. 2b
PDOTS
Waterfall plot															Raw Binary Area
															AVG						% change from Control
PDOTS ID	tumor type	Control	Control	Control	αPD-1	αPD-1	αPD-1	TBK1i	TBK1i	TBK1i	αPD-1 + TBK1i	αPD-1 + TBK1i	αPD-1 + TBK1i		Control	αPD-1	TBK1i	αPD-1 + TBK1i			αPD-1	TBK1i	αPD-1 + TBK1i
1	Melanoma	1.0286e+06	748315	680920	788133	602702	539141	89330.8	500566	422054	211436	451521	202243		819278	643325	337317	288400			-21.4765	-58.8275	-64.7983
2	Merkel cell carcinoma	716940	709535		618712	564046		778787	510948		641802	513914			713237	591379	644867	577858			-17.0853	-9.5859	-18.981
3	Renal cell carcinoma	458546	369525		267212	263094		179179	129533		143890	103116			414035	265153	154356	123503			-35.9588	-62.7191	-70.1709
4	CRC-MSI-H	573321	525313	704012	599797	441240	540774	390231	176292	292331	37445.7	85008.3	59716.2		600882	527270	286285	60723.4			-12.2506	-52.3559	-89.8943
5	Cutaneous melanoma	1013613	1132019	1514218	1413937	1249984	1694839	1261081	1395900	1486846	1000144	1543697	1066215		1219950	1452920	1.38128e+06	1203352			19.0967	13.224	-1.36055
6	Cutaneous melanoma	335290	437610	720518	240927	341448	567116	236727	161367	238053	163558	145045	196884		497806	383164	212049	168495			-23.0295	-57.4033	-66.1524
7	CRC-MSI-H	906788	612623	662269	442732	597588	325871	378469	51734.1	293396	279389	39856.3	199186		727227	455397	241200	172810			-37.379	-66.8329	-76.2371
8	Cutaneous melanoma	562996	686295	599369	337598	263528	714315	831285	507912	372712	421406	325062	640200		616220	438480	570636	462222			-28.8435	-7.39726	-24.9907
9	Cutaneous melanoma	505275	432567	363330	517514	464410	498517	755548	657816	695517	624906	900956	726494		433724	493480	702961	750785			13.7776	62.0756	73.1021
10	Ocular Melanoma	448848	439871	750552	672107	523178	674466	722967	789080	643048	770710	574486	784094		546424	623250	718365	709764			14.0599	31.4667	29.8925
11	Cutaneous melanoma	1.43809e+06	1.95053e+06	1.79223e+06	1.11877e+06	1.35606e+06	861857	1.22161e+06	1.57587e+06	853904	1.51992e+06	898107	1.29152e+06		1.72695e+06	1112230	1.21713e+06	1.23651e+06			-35.5957	-29.5216	-28.3989
12	Cutaneous melanoma	748329	508018	495454	1048398	797624	386544	650484	641538	380707	613178	474429	550746		583934	744189	557576	546118			27.444	-4.51383	-6.47609
13	Melanoma (pleural effusion)	714367	825799	628623	947644	1.24439e+06	1.16839e+06	962737	765629	1.22798e+06	999873	1.00508e+06	868249		722930	1.12014e+06	985448	957735			54.9448	36.3132	32.4798
14	Acral melanoma	365354	373207	398847	518465	306050	473705	197626	256574	396047	366351	336725	251011		379136	432740	283416	318029			14.1385	-25.2469	-16.1174
15	CRC (MSS)	151397	398372	233925	227858	127208	266897	127484	165781	261450	184163	156179	131390		261231	207321	184905	157244			-20.6369	-29.218	-39.8066
16	Cutaneous melanoma	586962	256489	358655	557958	567453	676065	462402	400131	306264	302845	272345	256435		400702	600492	389599	277208			49.8598	-2.77099	-30.8193
17	Cutaneous melanoma	128018	134602	132682	176674	160851	169024	93369.4	106554	87736	226742	172829	86034.4		131767	168850	95886.6	161869			28.1422	-27.2304	22.8443
18	Cutaneous melanoma	557838	580933	762599	528196	262871	513469	326058	300856	360880	648902	591953	768914		633790	434845	329264	669923			-31.3897	-48.0483	5.70117
19	Cutaneous melanoma	95787.7	72785.1	71282	63261.2	101759	141311	144235	91126.3	107629	81633.4	39405.1	31673.1		79951.6	102110	114330	50903.9			27.7152	42.9992	-36.3316
20	Merkel cell carcinoma	1044641	456467	578784	475597	391788	516954	318817	281098	449975	443718	443344	580125		693297	461446	349963	489062			-33.4418	-49.5219	-29.4585
21	Cutaneous melanoma	1273894	1242598	1237990	942238	891352	1021404	845537	943047	780933	554338	864299	995019		1251494	951665	856506	804552			-23.9577	-31.5613	-35.7127
22	Cutaneous melanoma	289090	740695	426892	828093	672486	412204	419810	436697	396581	505032	370464	468077		485559	637595	417696	447858			31.3114	-13.9763	-7.76462
23	CRC (MSS)	365129	239481	239752	277458	298104	447956	309469	336125	484724	296245	332038	407602		281454	341173	376772	345295			21.2179	33.8665	22.6827
24	Cutaneous melanoma	170280	462768	201220	399128	400696	290661	414850	604747	334645	327704	249647	266805		278089	363495	451414	281385			30.7115	62.3269	1.18516
25	pancreatic adenocarcinoma (PDAC)	3.34754e+06	3.35687e+06	2.83458e+06	3.22411e+06	2.94683e+06	2.9867e+06	3.0177e+06	2.86078e+06	2.5755e+06	2.64592e+06	2.228e+06	2.32861e+06		3.17966e+06	3.05255e+06	2.81799e+06	2.40084e+06			-3.99776	-11.3746	-24.4938
26	head & neck squamous cell carcinoma (HNSCC)	1065076	769793	1162119	1041674	1062897	706518	924765	691552	1000345	970536	950998	930685		998996	937030	872221	950740			-6.20283	-12.6902	-4.83045
27	TNBC	3.21108e+06	2.73415e+06	2.92295e+06	2.23736e+06	2.40347e+06	2.00322e+06	1.569e+06	1.7365e+06	1.66777e+06	1.35134e+06	1.44512e+06	1.01254e+06		2.95606e+06	2.21468e+06	1.65776e+06	1.26967e+06			-25.08	-43.92	-57.0487
28	Merkel cell carcinoma	608300	822576	659668	448952	602535	598848	520295	566012	701334	101223	476794	771208		696848	550111	595880	449741			-21.0572	-14.4892	-35.4606
29	CRC (MSS)	300878	494751	516823	730885	444579	518522	516753	519870	748453	437252	672667	408564		437484	564662	595025	506161			29.0704	36.0108	15.6982
30	CRC (MSS)	1.69658e+06	2.02815e+06	2.51553e+06	2.29519e+06	1.83764e+06	1.31723e+06	1.94193e+06	1.8236e+06	2.21388e+06	1.86783e+06	1.75758e+06	1.76105e+06		2.08009e+06	1.81669e+06	1.99314e+06	1.79549e+06			-12.6629	-4.1801	-13.6821

## Sheet: Fig. 2c
Fig. 2c
PDOTS-01
Melanoma
				Raw
		Control	1.0286e+06	748315	680920
		αPD-1	788133	602702	539141
		αCTLA-4	864415	635013	586153
		αPD-1 + αCTLA-4	846390	719495	604059
		TBK1i	89330.8	500566	422054
		αPD-1+TBK1i	211436	451521	202243
				FC
		Control	1	0.72751	0.661989
		αPD-1	0.766221	0.585945	0.524152
		αCTLA-4	0.840382	0.617358	0.569856
		αPD-1 + αCTLA-4	0.822858	0.699491	0.587264
		TBK1i	0.0868472	0.486649	0.410319
		αPD-1+TBK1i	0.205558	0.438968	0.19662
				L2FC
		Control	0	-0.45896	-0.595121
		αPD-1	-0.384167	-0.771163	-0.931944
		αCTLA-4	-0.250883	-0.69582	-0.81133
		αPD-1 + αCTLA-4	-0.281285	-0.515622	-0.767918
		TBK1i	-3.52538	-1.03905	-1.28518
		αPD-1+TBK1i	-2.28238	-1.18781	-2.34652

## Sheet: Fig. 2d
Fig. 2d
PDOTS-06
Melanoma
				Raw
		Control	335290	437610	720518
		αPD-1	240927	341448	567116
		TBK1i	236727	161367	238053
		αPD-1+TBK1i	163558	145045	196884
				FC
		Control	1	1.30517	2.14894
		αPD-1	0.718562	1.01837	1.69142
		TBK1i	0.706037	0.481274	0.709989
		αPD-1+TBK1i	0.48781	0.432594	0.587204
				L2FC
		Control	0	0.384233	1.10362
		αPD-1	-0.476814	0.0262565	0.758233
		TBK1i	-0.502184	-1.05507	-0.494131
		αPD-1+TBK1i	-1.03561	-1.20891	-0.768067

## Sheet: Fig. 2e
Fig. 2e
PDOTS-04
MSI-H CRC
				Raw
		Control	573321	525313	704012
		αPD-1	599797	441240	540774
		TBK1i	390231	176292	292331
		αPD-1+TBK1i	37445.7	85008.3	59716.2
				FC
		Control	1	0.916262	1.22795
		αPD-1	1.04618	0.769621	0.94323
		TBK1i	0.680649	0.307492	0.509891
		αPD-1+TBK1i	0.0653137	0.148273	0.104158
				L2FC
		Control	0	-0.126167	0.296257
		αPD-1	0.06513	-0.377779	-0.0843178
		TBK1i	-0.555017	-1.70138	-0.971739
		αPD-1+TBK1i	-3.93647	-2.75367	-3.26315

[truncated: 20 more sheets: Fig. 2f, Fig. 3e, Fig. 3k,l, Fig. 4a, Fig. 4b, Fig. 4c, Fig. 4d, Fig. 4f, Fig. 4g, Fig. 4h, Fig. 4j, Fig. 4k, Fig. 4l, Fig. 4m, Fig. 4n, Fig. 5b, Fig. 5c, Fig. 5e, Fig. 5g, Fig. 5h]
